# Supplementary material
Source: PubMed Central journal article supplement (PMC2799887)
Supplement: 0911354106_ST2_PDF.pdf [file 0911354106_ST2_PDF.pdf]

**Table S2. NCLDV core genes identified in Marseillevirus**

| <b>NCLDV core gene (8, 9)</b>                              | <b>Homolog ORF in Marseillevirus genome</b> |
|------------------------------------------------------------|---------------------------------------------|
| <u>DNA replication</u>                                     |                                             |
| Family B DNA polymerase                                    | ORF329                                      |
| D5R like helicase                                          | ORF152                                      |
| AEP-type primase                                           | ORF152                                      |
| PCNA                                                       | ORF212                                      |
| SWI/SNF2 ATPase                                            | ORF203, ORF241                              |
| RuvC like Holliday junction resolvase                      | ORF216                                      |
| ATP dependent DNA ligase                                   | ORF72                                       |
| NAD dependent DNA ligase?                                  | -                                           |
| Topoisomerase II                                           | ORF173                                      |
| <u>DNA precursor synthesis</u>                             |                                             |
| dUTPase                                                    | -                                           |
| Ribonucleotide reductase large subunit                     | ORF211                                      |
| Ribonucleotide reductase small subunit                     | ORF268                                      |
| Thymidine kinase                                           | -                                           |
| Thymidylate kinase                                         | -                                           |
| Thymidylate synthase                                       | ORF429                                      |
| <u>Transcription and RNA processing</u>                    |                                             |
| RNA polymerase large subunit                               | ORF55_ORF52                                 |
| RNA polymerase subunit 2                                   | ORF23                                       |
| RNA polymerase subunit 10                                  | -                                           |
| RNA polymerase subunit 5                                   | ORF383                                      |
| A1L transcription factor/late transcription factor VLTF-2  | ORF237                                      |
| TFIIS-like zinc ribbon                                     | ORF222                                      |
| A2L like transcription factor                              | ORF340                                      |
| A7L like transcription factor                              | ORF306                                      |
| Bro-N domain                                               | -                                           |
| KilA-N domain                                              | -                                           |
| D6R/D11L like helicase                                     | ORF203, ORF241                              |
| A18R like helicase                                         | ORF270                                      |
| I8 like helicase                                           | -                                           |
| Capping enzyme                                             | ORF314                                      |
| G5R like FLAP endonuclease                                 | ORF365                                      |
| E1L like polyA polymerase                                  | -                                           |
| Nudix hydrolase                                            | ORF242, ORF277                              |
| <u>Virion packaging and morphogenesis</u>                  |                                             |
| A32-like packaging ATPase                                  | ORF157                                      |
| Thiol oxidoreductase (E10R thiol reductase)                | ORF310                                      |
| Thioredoxin fold protein                                   | ORF231, ORF313, ORF332                      |
| F10-like protein kinase                                    | -                                           |
| H1L like phosphatase                                       | -                                           |
| Capsid protein                                             | ORF342                                      |
| L1 like myristoylated virion protein                       | -                                           |
| J5L-like virion membrane protein                           | -                                           |
| SMT4-like thiol peptidase                                  | -                                           |
| A3L/P4B-like protein?                                      | -                                           |
| G1L like metalloprotease?                                  | -                                           |
| <u>Host-virus interactions</u>                             |                                             |
| Ankyrin repeats ( <i>not necessarily of NCLDV origin</i> ) | ORF331, ORF445, ORF316, ORF330              |
