# Supplementary material
Source: PubMed Central journal article supplement (PMC2799887)
Supplement: 0911354106_ST3_PDF.pdf [file 0911354106_ST3_PDF.pdf]

**Table S3. Self-clusters of Marseillevirus proteins**

| Cluster # | Cluster annotation                                                      | Number of proteins in cluster | E-value*         | Bit score* | ORFs included                                                                                                                                                |
|-----------|-------------------------------------------------------------------------|-------------------------------|------------------|------------|--------------------------------------------------------------------------------------------------------------------------------------------------------------|
| cluster1  | MORN repeat-containing protein (a protein conserved in bacteria)        | 20                            | 2.0E-22/2.5E+00  | 100/27.3   | ORF103, ORF124, ORF132, ORF133, ORF134, ORF137, ORF142, ORF143, ORF144, ORF159, ORF169, ORF188, ORF254, ORF355, ORF361, ORF366, ORF434, ORF50, ORF49, ORF246 |
| cluster2  | Serine/threonine protein kinase                                         | 11                            | 2.5E-26/2.4E+00  | 115/28.5   | ORF122, ORF160, ORF191, ORF195, ORF199, ORF264, ORF424, ORF427, ORF432, ORF446, ORF84                                                                        |
| cluster3  | F-box containing protein                                                | 9                             | 1.0E-66/2.5E+00  | 248/26.9   | ORF106, ORF146, ORF151, ORF19, ORF28, ORF385, ORF39, ORF42, ORF68                                                                                            |
| cluster4  | Restriction endonuclease, contains N-terminal multiple Zn-ribbon domain | 8                             | 1.0E-161/1.7E+00 | 565/28.1   | ORF154, ORF156, ORF245, ORF327, ORF347, ORF349, ORF40, ORF409                                                                                                |
| cluster5  | distinct repeats/low complexity HA-like repeats                         | 8                             | 1.5E-154/6.3E-01 | 541/27.7   | ORF25, ORF257, ORF26, ORF43, ORF44, ORF45, ORF66, ORF67                                                                                                      |
| cluster6  | unnamed protein product                                                 | 6                             | 7.5E-35/3.0E-01  | 142/31.2   | ORF1, ORF105, ORF3, ORF457, ORF87, ORF93                                                                                                                     |
| cluster7  | unnamed protein product                                                 | 5                             | 1.3E-77/2.3E+00  | 286/25.8   | ORF139, ORF180, ORF183, ORF325, ORF34                                                                                                                        |
| cluster8  | unnamed protein product                                                 | 5                             | 5.0E-17/1.0E-04  | 81.3/40    | ORF138, ORF185, ORF35, ORF38, ORF458                                                                                                                         |
| cluster9  | HNH-family endonuclease                                                 | 5                             | 2.0E-27/3.0E+01  | 28.9/6.9   | ORF248, ORF295, ORF318, ORF387a, ORF387b                                                                                                                     |
| cluster10 | MutH/archaeal HJR-like endonuclease                                     | 4                             | 1.3E-69/5.0E-09  | 259/58.9   | ORF249, ORF301, ORF371, ORF428                                                                                                                               |
| cluster11 | divergent serine/threonine protein kinase                               | 3                             | 2.5E-45/7.5E-27  | 177/115    | ORF352, ORF353, ORF360                                                                                                                                       |
| cluster12 | unnamed protein product                                                 | 3                             | 5.0E-19/2.5E-08  | 89/52.8    | ORF374, ORF375, ORF376                                                                                                                                       |
| cluster13 | unnamed protein product                                                 | 3                             | 2.3E-07/2.3E-03  | 48.9/36.6  | ORF117, ORF164, ORF280                                                                                                                                       |
| cluster14 | Highly derived D5-like helicase-primase                                 | 2                             | 0,0E+00          | 978        | ORF36, ORF459                                                                                                                                                |
| cluster15 | Histone 2A-domain-containing protein                                    | 2                             | 5,0E-15          | 77         | ORF166, ORF414                                                                                                                                               |
| cluster16 | low complexity, invasin-like repeats                                    | 2                             | 1,0E-36          | 149        | ORF149, ORF73                                                                                                                                                |
| cluster17 | membrane protein                                                        | 2                             | 7,5E-27          | 118        | ORF273, ORF274                                                                                                                                               |
| cluster18 | papain-like cysteine peptidase (Cathepsin B group ) unique among NCLDV  | 2                             | 2,0E-33          | 139        | ORF276, ORF285                                                                                                                                               |
| cluster19 | putative nucleases linked to bacterial restriction-modification         | 2                             | 1,3E-11          | 66,2       | ORF181, ORF367                                                                                                                                               |
| cluster20 | small membrane protein                                                  | 2                             | 4,3E-01          | 28,1       | ORF120, ORF121                                                                                                                                               |
| cluster21 | Thioredoxin                                                             | 3                             | 1,5E-04          | 40         | ORF231, ORF332, ORF313                                                                                                                                       |
| cluster22 | unnamed protein product                                                 | 2                             | 1,8E-10          | 60,8       | ORF2, ORF90                                                                                                                                                  |
| cluster23 | unnamed protein product                                                 | 2                             | 2,5E-11          | 63,2       | ORF158, ORF287                                                                                                                                               |
| cluster24 | unnamed protein product                                                 | 2                             | 1,1E+00          | 26,9       | ORF348, ORF405                                                                                                                                               |
| cluster25 | unnamed protein product                                                 | 2                             | 2,5E-12          | 66,2       | ORF336, ORF337                                                                                                                                               |
| cluster26 | unnamed protein product                                                 | 2                             | 1,8E-07          | 49,7       | ORF20, ORF8                                                                                                                                                  |
| cluster27 | unnamed protein product                                                 | 2                             | 2,0E-19          | 91,7       | ORF167, ORF171                                                                                                                                               |
| cluster28 | zinc finger protein                                                     | 2                             | 1,0E-49          | 248        | ORF321, ORF70                                                                                                                                                |

\* Best/worst values for clusters of 3 and more proteins.
