# Supplementary material
Source: PubMed Central journal article supplement (PMC2799887)
Supplement: 0911354106_ST4_PDF.pdf [file 0911354106_ST4_PDF.pdf]

**Table S4. Detailed analysis of 188 Marcellivirus proteins having homologs in Redseq.**

| ORF                                                                       | Marcellivirus self-cluster | Marcellivirus annotation                                                                         | Mimi-,<br>Marseille,<br><i>Acanthamoeba</i><br>grouped?<br>Yes/No | Best Refseq hit |           |        | Inferred Origin**  | Corresponding ML tree number in Fig. S4 | Mimi- and Marcellivirus only? Yes/No | Hits to <i>Acanthamoeba</i>         |           |                                  |
|---------------------------------------------------------------------------|----------------------------|--------------------------------------------------------------------------------------------------|-------------------------------------------------------------------|-----------------|-----------|--------|--------------------|-----------------------------------------|--------------------------------------|-------------------------------------|-----------|----------------------------------|
|                                                                           |                            |                                                                                                  |                                                                   | nick            | Gi number | Phyla* |                    |                                         |                                      | Bit score, if better than to Refseq | # of hits | <i>Acanthamoeba</i> hits: Yes/No |
|                                                                           |                            |                                                                                                  |                                                                   |                 |           |        |                    |                                         |                                      |                                     |           |                                  |
| <b>DNA replication, recombination, repair<br/>(37 proteins, 22 trees)</b> |                            |                                                                                                  |                                                                   |                 |           |        |                    |                                         |                                      |                                     |           |                                  |
| 293                                                                       |                            | AP (apurinic) endonuclease family 2 - bacterial                                                  | No                                                                | Bb_Bacvu        | 150004972 | B      | NCLDV              | 4.1                                     | No                                   | 0                                   | No        |                                  |
| 173                                                                       |                            | DNA topoisomerase II                                                                             | No                                                                | El_Enccu        | 19074112  | E      | NCLDV              | 4.2                                     | No                                   | 2                                   | Yes       |                                  |
| 156                                                                       | Cluster 4                  | Restriction endonuclease, contains N-terminal multiple Zn-ribbon domain                          | No                                                                | Vn_Acapo        | 55819502  | V      | NCLDV (Iridogroup) | 4.3                                     | No                                   | 0                                   | No        |                                  |
| 245                                                                       | Cluster 4                  | Restriction endonuclease, contains N-terminal multiple Zn-ribbon domain                          | No                                                                | Vn_Acapo        | 55819502  | V      | NCLDV (Iridogroup) | 4.4                                     | No                                   | 0                                   | No        |                                  |
| 327                                                                       | Cluster 4                  | Restriction endonuclease, contains N-terminal multiple Zn-ribbon domain                          | No                                                                | Vn_Acapo        | 55819502  | V      | NCLDV (Iridogroup) | -                                       | No                                   | 0                                   | No        |                                  |
| 349                                                                       | Cluster 4                  | Restriction endonuclease, contains N-terminal multiple Zn-ribbon domain                          | No                                                                | Vn_Acapo        | 55819502  | V      | NCLDV (Iridogroup) | -                                       | No                                   | 0                                   | No        |                                  |
| 289                                                                       |                            | putative nuclease linked to bacterial restriction-modification                                   | No                                                                | Vn_Lymdi        | 13358473  | V      | NCLDV (Iridogroup) | -                                       | No                                   | 0                                   | No        |                                  |
| 409                                                                       | Cluster 4                  | Restriction endonuclease, contains N-terminal multiple Zn-ribbon domain                          | No                                                                | Vn_Acapo        | 55819502  | V      | NCLDV (Iridogroup) | -                                       | No                                   | 0                                   | No        |                                  |
| 40                                                                        | Cluster 4                  | Restriction endonuclease, contains N-terminal multiple Zn-ribbon domain                          | No                                                                | Vn_Acapo        | 55819502  | V      | NCLDV (Iridogroup) | -                                       | No                                   | 0                                   | No        |                                  |
| 154                                                                       | Cluster 4                  | Zn-ribbon like motif, a part of Restriction endonuclease                                         | No                                                                | Vn_Acapo        | 55819502  | V      | uncertain          | -                                       | No                                   | 0                                   | No        |                                  |
| 347                                                                       | Cluster 4                  | Zn-ribbon like motif, a part of Restriction endonuclease                                         | No                                                                | Vn_Acapo        | 55819502  | V      | uncertain          | -                                       | No                                   | 0                                   | No        |                                  |
| 301                                                                       | Cluster 10                 | Vsr/MutH/archaeal HJR-family nuclease (C-terminal domain, N-terminal Zn-ribbon)                  | No                                                                | Ba_Corgl        | 19552988  | B      | Bacteria/phages    | -                                       | No                                   | 0                                   | No        |                                  |
| 371                                                                       | Cluster 10                 | Csr/MutH/archaeal HJR family nuclease                                                            | No                                                                | Vn_Invir        | 15078985  | V      | Bacteria/phages    | -                                       | No                                   | 0                                   | No        |                                  |
| 249                                                                       | Cluster 10                 | MutH/Vsr/archaeal HJR-like endonuclease                                                          | No                                                                | Vn_Invir        | 15078985  | V      | Bacteria/phages    | -                                       | No                                   | 0                                   | No        |                                  |
| 428                                                                       | Cluster 10                 | Vsr/MutH/archaeal HJR family endonuclease                                                        | No                                                                | Vn_Invir        | 15078985  | V      | Bacteria/phages    | -                                       | No                                   | 0                                   | No        |                                  |
| 248                                                                       | Cluster 9                  | HNH family endonuclease                                                                          | No                                                                | Vn_Azoph        | 168495129 | V      | uncertain          | 4.4                                     | No                                   | 0                                   | No        |                                  |
| 318                                                                       | Cluster 9                  | HNH endonuclease                                                                                 | No                                                                | Bf_Clobo        | 237795751 | B      | other Eukaryota    | 4.5                                     | No                                   | 0                                   | No        |                                  |
| 295                                                                       | Cluster 9                  | HNH-family endonuclease (2 tandem HNH domains)                                                   | No                                                                | Bf_Blaha        | 221077669 | B      | other Eukaryota    | 4.6                                     | No                                   | 0                                   | No        |                                  |
| 387a                                                                      | Cluster 9                  | HNH-family endonuclease                                                                          | No                                                                | Bb_Grafo        | 120436764 | B      | other Eukaryota    | 4.7                                     | No                                   | 0                                   | No        |                                  |
| 387b                                                                      | Cluster 9                  | HNH-family endonuclease                                                                          | No                                                                | Bb_Grafo        | 120436765 | B      | other Eukaryota    | 4.7                                     | No                                   | 0                                   | No        |                                  |
| 212                                                                       |                            | Proliferating Cell Nuclear Antigen (DNA replication and repair), also present in phycodna, irido | No                                                                | El_Homsa        | 4505641   | E      | NCLDV (Iridogroup) | 4.8                                     | No                                   | 1                                   | Yes       |                                  |

|                                                         |            |                                                                                                               |                       |          |           |   |                                 |      |     |           |     |     |
|---------------------------------------------------------|------------|---------------------------------------------------------------------------------------------------------------|-----------------------|----------|-----------|---|---------------------------------|------|-----|-----------|-----|-----|
| 181                                                     | Cluster 19 | putative nuclease linked to bacterial restriction-modification systems                                        | No                    | El_Copci | 169867348 | E | other Eukaryota                 | 4.9  | No  | 0         | No  |     |
| 367                                                     | Cluster 19 | putative nuclease linked to bacterial restriction-modification systems                                        | No                    | El_Copci | 169867142 | E | other Eukaryota                 | 4.9  | No  | 0         | No  |     |
| 216                                                     |            | RuvC-like Holiday Junction Resolvase                                                                          | No                    | Vn_Invir | 109287975 | V | NCLDV (Iridogroup)              | 4.10 | No  | 0         | No  |     |
| 315                                                     |            | DNA repair exonuclease SbcCD, D subunit (active nuclease of the calcineurin family)                           | No                    | Vn_Invir | 15078956  | V | NCLDV (Iridogroup)              | 4.11 | No  | 0         | No  |     |
| 118                                                     |            | SMC1 family ATPase                                                                                            | No                    | Vn_Invir | 15078763  | V | NCLDV (Iridogroup)              | -    | No  | 0         | No  |     |
| 258                                                     |            | AlkB, Alkylated DNA repair protein                                                                            | No                    | Bp_Shefr | 114562122 | B | Bacteria/phages                 | 4.12 | No  | 3         | Yes |     |
| 319                                                     |            | XRN1, 5'-3' exonuclease                                                                                       | No                    | E9_Ostlu | 145347657 | E | NCLDV (Iridogroup)              | 4.13 | No  | 3         | Yes |     |
| 404                                                     |            | AAA family ATPase                                                                                             | No                    | Ec_Tetth | 118378556 | E | NCLDV                           | 4.14 | No  | 4         | Yes |     |
| 365                                                     |            | flap-specific endonuclease (poxvirus G5 homolog)                                                              | No                    | El_Yarli | 50556476  | E | NCLDV (Iridogroup)              | 4.15 | No  | 3         | Yes |     |
| 152                                                     |            | D5 family helicase-primase                                                                                    | No                    | Vn_Invir | 15078896  | V | NCLDV (Iridogroup)              | 4.16 | No  | 0         | No  |     |
| 184                                                     |            | helicase origin-binding-protein (UL9) like (closest to mimi)                                                  | No                    | Vn_Acapo | 55818882  | V | Bacteria/phages (Herpesviridae) | 4.17 | No  | 0         | No  |     |
| 36                                                      | Cluster 14 | Highly derived D5-like helicase-primase                                                                       | No                    | Ew_Triva | 123194009 | E | Bacteria/phages                 | 4.18 | No  | 0         | No  |     |
| 459                                                     | Cluster 14 | Highly derived D5-like helicase-primase                                                                       | No                    | Ew_Triva | 123194009 | E | Bacteria/phages                 | 4.18 | No  | 0         | No  |     |
| 72                                                      |            | ATP-dependent DNA ligase                                                                                      | No                    | Vn_Erwph | 219681337 | V | uncertain                       | 4.19 | No  | 0         | No  |     |
| 329                                                     |            | DNA polymerase elongation subunit (family B)                                                                  | No                    | E9_Vitvi | 225431691 | E | NCLDV (Iridogroup)              | 4.20 | No  | 3         | Yes |     |
| 398                                                     |            | uracil-DNA glycosylase, D4 (plus additional N-term)                                                           | No                    | Bp_gampr | 225091234 | B | Bacteria/phages                 | 4.21 | No  | 3         | Yes |     |
| 408                                                     |            | helicase superfamily I member (RecD, ATP-dependent exoDNAse (exonuclease V), alpha subunit), ortholog in mimi | No                    | Bb_Salru | 83814185  | B | Bacteria/phages                 | 4.22 | No  | 0         |     |     |
| <b>Nucleotide metabolism<br/>(11 proteins, 9 trees)</b> |            |                                                                                                               |                       |          |           |   |                                 |      |     |           |     |     |
| 217                                                     |            | dNMP kinase                                                                                                   | No                    | Bf_Pelth | 147678482 | B | Bacteria/phages                 | 4.23 | Yes | 0         | No  |     |
| 17                                                      |            | Dam-like adenine-specific DNA methylase                                                                       | No                    | Vn_Parbu | 157953891 | V | NCLDV (Phycodna)                | 4.24 | No  | 0         | No  |     |
| 429                                                     |            | bifunctional dihydrofolate reductase-thymidylate synthase, found in some phycodna                             | No                    | E9_Vitvi | 225428412 | E | Amoebozoa (Acan)                | 4.25 | No  | 3         | No  |     |
| 157                                                     |            | A32-like packaging ATPase                                                                                     | No                    | Vn_Invir | 109287966 | V | NCLDV (Iridogroup)              | 4.26 | No  | 1 (short) | Yes |     |
| 211                                                     |            | ribonucleoside diphosphate reductase, alpha subunit                                                           | No                    | Vn_Parbu | 157953136 | V | NCLDV                           | 4.27 | No  | 3         | Yes |     |
| 268                                                     |            | Ribonucleotide reductase, small chain                                                                         | No                    | Ek_Trybr | 74025554  | E | uncertain                       | 4.28 | No  | 1         | Yes |     |
| 236                                                     |            | Thymidine kinase                                                                                              | No                    | Vn_Ostvi | 163955199 | V | other Eukaryota                 | 4.29 | No  | weak      | No  |     |
| 131                                                     |            | DHH family phosphohydrolase                                                                                   | No                    | Bq_Sulye | 237756294 | B | other Eukaryota                 | 4.30 | Yes | 0         | No  |     |
| 326                                                     |            | P-loop ATPase or GTPase                                                                                       | Yes (grouped by tree) | Vn_Acapo | 55819479  | V | Amoebozoa (Acan)                | 4.31 | Yes | 145       | 1   | Yes |

|                                                                                               |            |                                                                              |                               |          |           |   |                    |      |     |                   |     |     |
|-----------------------------------------------------------------------------------------------|------------|------------------------------------------------------------------------------|-------------------------------|----------|-----------|---|--------------------|------|-----|-------------------|-----|-----|
| 423                                                                                           |            | putative P-loop kinase or ATPase                                             | No                            | El_Vanpo | 156846500 | E | uncertain          | -    | No  | 0                 | No  |     |
| 15                                                                                            |            | dUTPase (fragment; w/o C-terminal)                                           | No                            | Bb_Capoc | 229255544 | B | Bacteria/phages    | -    | No  | 0                 | No  |     |
| <b>Signaling (Serine/Threonine protein kinases)<br/>(15 proteins, 12 trees)</b>               |            |                                                                              |                               |          |           |   |                    |      |     |                   |     |     |
| 160                                                                                           | Cluster 2  | Serine/Threonine protein kinase                                              | No                            | Ec_Parte | 145516466 | E | Amoebozoa (Acan)   | 4.33 | No  | 3                 | Yes |     |
| 195                                                                                           | Cluster 2  | Serine/Threonine protein kinase                                              | No                            | Ec_Parte | 145545584 | E | Amoebozoa (Acan)   | 4.34 | No  | 3                 | Yes |     |
| 199                                                                                           | Cluster 2  | Serine/Threonine protein kinases, catalytic domain                           | No                            | El_Triad | 195999760 | E | other Eukaryota    | 4.35 | No  | 3                 | Yes |     |
| 191                                                                                           | Cluster 2  | Serine/Threonine protein kinase                                              | No                            | El_Drovi | 195400809 | E | other Eukaryota    | 4.36 | No  | 0                 | No  |     |
| 264                                                                                           | Cluster 2  | Serine/Threonine protein kinase catalytic domain-containing protein          | No                            | El_Macmu | 109088453 | E | Amoebozoa (Acan)   | 4.37 | No  | 4                 | Yes |     |
| 424                                                                                           | Cluster 2  | Serine/threonine-protein kinase                                              | No                            | Ea_Dicdi | 66809477  | E | other Eukaryota    | 4.38 | No  | 5                 | Yes |     |
| 84                                                                                            | Cluster 2  | serine/threonine protein kinase                                              | No                            | Bp_Acier | 148261089 | B | Amoebozoa (Enta)   | 4.39 | No  | 3                 | Yes |     |
| 432                                                                                           | Cluster 2  | Serine/threonine-protein kinase                                              | No                            | Bp_Myxxa | 108762484 | B | Amoebozoa (Acan)   | 4.40 | No  | 2(both are short) | Yes |     |
| 446                                                                                           | Cluster 2  | Serine/threonine-protein kinase                                              | No                            | Bf_Eubdo | 160915564 | B | other Eukaryota    | 4.41 | No  | 3                 | Yes |     |
| 427                                                                                           | Cluster 2  | Serine/threonine-protein kinase                                              | No                            | El_Caebr | 157752042 | E | uncertain          | 4.42 | No  | 3                 | Yes |     |
| 352                                                                                           | Cluster 11 | divergent Serine/Threonine protein kinase                                    | No                            | El_Brafl | 219454788 | E | uncertain          | 4.43 | No  | 0                 | No  |     |
| 353                                                                                           | Cluster 11 | divergent Serine/Threonine protein kinase                                    | No                            | E9_Orysa | 115489454 | E | uncertain          | 4.43 | No  | 0                 | No  |     |
| 360                                                                                           | Cluster 11 | divergent Serine/Threonine protein kinase                                    | No                            | Eh_Heman | 160331667 | E | uncertain          | 4.43 | No  | 0                 | No  |     |
| 260                                                                                           |            | divergent Serine/Threonine protein kinase                                    | No                            | Vn_Invir | 15078921  | V | NCLDV (Iridogroup) | -    | No  | 0                 | No  |     |
| 122                                                                                           | Cluster 2  | serine/threonine protein kinase, duplicated kinase domain                    | Yes (grouped by tree; unique) | Vn_Acapo | 55819780  | V | Amoebozoa (Acan)   | 4.32 | Yes | Y                 | Yes |     |
| <b>Protein and lipid synthesis, modification, and degradation<br/>(28 proteins, 10 trees)</b> |            |                                                                              |                               |          |           |   |                    |      |     |                   |     |     |
| 269                                                                                           |            | chaperone protein DnaJ (both J and Zn-finger domains, bacterial type)        | No                            | Bp_CanBl | 71891902  | B | NCLDV              | 4.44 | No  | 3                 | Yes |     |
| 310                                                                                           |            | Erv1/Alr family protein - ortholog of poxvirus E10, disulfide oxidoreductase | No                            | Vn_Infsp | 19881448  | V | NCLDV              | 4.45 | No  | 58,2              | 1   | Yes |
| 151                                                                                           | Cluster 3  | F-box containing protein                                                     | No                            | El_Chagl | 116208368 | E | other Eukaryota    | -    | No  | 0                 | No  |     |
| 19                                                                                            | Cluster 3  | F-box containing protein                                                     | No                            | El_Trica | 91088783  | E | other Eukaryota    | -    | No  | 0                 | No  |     |
| 42                                                                                            | Cluster 3  | F-box containing protein                                                     | No                            | Bh_Chlau | 163849439 | B | other Eukaryota    | -    | No  | 0                 | No  |     |
| 28                                                                                            | Cluster 3  | F-box containing protein                                                     | No                            | El_Aspte | 115390899 | E | other Eukaryota    | -    | No  | 0                 | No  |     |
| 106                                                                                           | Cluster 3  | F-box containing protein                                                     | No                            | Bu_Fusmo | 237736453 | B | Bacteria/phages    | -    | No  | 1(short)          | Yes |     |
| 146                                                                                           | Cluster 3  | F-box containing protein                                                     | No                            | El_Brafl | 219484040 | E | other Eukaryota    | -    | No  | weak              | No  |     |
| 385                                                                                           | Cluster 3  | F-box containing protein                                                     | No                            | El_Culqu | 170052485 | E | uncertain          | -    | No  | weak              | No  |     |

|                                                                             |            |                                                                                               |    |          |           |   |                    |      |    |                       |     |     |
|-----------------------------------------------------------------------------|------------|-----------------------------------------------------------------------------------------------|----|----------|-----------|---|--------------------|------|----|-----------------------|-----|-----|
| 39                                                                          | Cluster 3  | F-box containing protein                                                                      | No | El_Bosta | 194678444 | E | other Eukaryota    | -    | No | weak                  | No  |     |
| 285                                                                         | Cluster 18 | papain-like cysteine peptidase (Cathepsin B group )                                           | No | XX_Giala | 159109223 | E | Amoebozoa (Acan)   | 4.46 | No | 4                     | Yes |     |
| 276                                                                         | Cluster 18 | papain-like cysteine peptidase (Cathepsin B group ) unique among NCLDV                        | No | E9_Phypa | 168026641 | E | Amoebozoa (Acan)   | 4.46 | No | 3                     | Yes |     |
| 189                                                                         |            | lipase class 3 (bacteria-specific)                                                            | No | El_Nemve | 156304116 | E | NCLDV              | 4.47 | No | weak                  | No  |     |
| 223                                                                         |            | Lipase class 3                                                                                | No | Ec_Tetth | 118378943 | E | Amoebozoa (Acan)   | 4.47 | No | 2                     | Yes |     |
| 334                                                                         |            | inactivated thioredoxin/glutaredoxin, poorly conserved homologs in some irido, phycodna, mimi | No | Vn_Invir | 109287908 | V | uncertain          | -    | No | 0                     | No  |     |
| 278                                                                         |            | metallopeptidase WLM                                                                          | No | Vn_Invir | 109287920 | V | NCLDV (Phycodna)   | 4.48 | No | 2(short)              | Yes |     |
| 228                                                                         |            | Patatin-like phospholipase, also present in phycodna, irido, asco                             | No | Vn_Acapo | 55819440  | V | uncertain          | 4.49 | No | 0                     | No  |     |
| 206                                                                         |            | RING-finger-E3 Ub ligase                                                                      | No | Ek_Trycr | 71420237  | E | other Eukaryota    | -    | No | short                 | No  |     |
| 231                                                                         | Cluster 21 | thioredoxin                                                                                   | No | Bp_Psest | 146280962 | B | Bacteria/phages    | -    | No | 1                     | Yes |     |
| 332                                                                         | Cluster 21 | Thioredoxin                                                                                   | No | Ec_Parte | 145527612 | E | other Eukaryota    | -    | No | 4 hits; all are short | Yes |     |
| 313                                                                         | Cluster 21 | thioredoxin                                                                                   | No | Vn_Invir | 15078908  | V | Bacteria/phages    | -    | No | 0                     | No  |     |
| 247                                                                         |            | Ubiquitin                                                                                     | No | Ec_Tetth | 118399883 | E | Amoebozoa (Acan)   | 4.50 | No | 133                   | 10  | Yes |
| 416                                                                         |            | peptidoglycan peptidase                                                                       | No | Ec_Parte | 145498469 | E | Bacteria/phages    | 4.51 | No | 0                     | No  |     |
| 331                                                                         |            | ankyrin repeat protein                                                                        | No | Bp_Sorce | 162451350 | B | Bacteria/phages    | 4.52 | No | 1(weak)               | Yes |     |
| 316                                                                         |            | ankyrin repeat-containing protein                                                             | No | Bp_Ricbe | 91205812  | B | Bacteria/phages    | -    | No | weak                  | No  |     |
| 330                                                                         |            | ankyrin repeat-containing protein                                                             | No | El_Aspor | 169782465 | E | other Eukaryota    | -    | No | weak                  | No  |     |
| 445                                                                         |            | ankyrin repeat-containing protein                                                             | No | Ea_Dicdi | 66801041  | E | other Eukaryota    | -    | No | 4                     | Yes |     |
| 407                                                                         |            | ubiquitin-like protein                                                                        | No | El_Brafl | 219418836 | E | other Eukaryota    | 4.53 | No | 0                     | No  |     |
| <b>Transcription and chromatin modification<br/>(31 proteins, 16 trees)</b> |            |                                                                                               |    |          |           |   |                    |      |    |                       |     |     |
| 203                                                                         |            | D6/D11-like helicase                                                                          | No | Vn_Acapo | 55819789  | V | NCLDV (Poxvir)     | 4.54 | No | 1 (short)             | Yes |     |
| 241                                                                         |            | D6/D11 like helicase                                                                          | No | Vn_Lymdi | 51870029  | V | NCLDV (Iridogroup) | 4.54 | No | 0                     | No  |     |
| 270                                                                         |            | helicase of superfamily II                                                                    | No | Vn_Invir | 15078874  | V | NCLDV (Iridogroup) | 4.55 | No | 0                     | No  |     |
| 166                                                                         | Cluster 15 | Histone 2A-domain-containing protein                                                          | No | El_Danre | 68442127  | E | Amoebozoa (Dict)   | 4.56 | No | 1(+3 orf414)          | Yes |     |
| 414                                                                         | Cluster 15 | histone H2B (partial) fused to histone H2A                                                    | No | El_Musmu | 28316756  | E | Other Eukaryota    | 4.56 | No | 3                     | Yes |     |
| 413                                                                         |            | histone H3                                                                                    | No | Ek_Leima | 157868174 | E | Other Eukaryota    | 4.57 | No | 0                     | No  |     |
| 306                                                                         |            | Poxvirus early transcription factor (VETF), large subunit                                     | No | Vn_Invir | 15079007  | V | NCLDV (Iridogroup) | -    | No | 0                     | No  |     |

|                                          |            |                                                                                                                               |                             |          |           |   |                                 |                                                  |     |                      |     |     |
|------------------------------------------|------------|-------------------------------------------------------------------------------------------------------------------------------|-----------------------------|----------|-----------|---|---------------------------------|--------------------------------------------------|-----|----------------------|-----|-----|
| 197                                      |            | RNA ligase (conserved in irido and asco[previously undetected]; in baculoviruses fused to a C-terminal polynucleotide kinase) | No                          | Vn_Invir | 15079104  | V | NCLDV (Iridogroup)              | 4.58                                             | No  | 0                    | No  |     |
| 314                                      |            | 3-domain mRNA capping enzyme, apparently, not of viral origin                                                                 | No                          | E9_Ostlu | 145343780 | E | Amoebozoa (Acan)                | 4.59                                             | No  | 1                    | Yes |     |
| 213                                      |            | Transcription initiation factor TFIIB                                                                                         | No                          | Ae_Metka | 20094294  | A | NCLDV (Phycodna)                | 4.60                                             | No  | 0                    | No  |     |
| 277                                      |            | NUDIX hydrolase (D10 ortholog)                                                                                                | No                          | Vn_Acapo | 55819250  | V | uncertain                       | -                                                | No  | 0                    | No  |     |
| 242                                      |            | NUDIX hydrolase (D1/D9 homologs, decapping enzyme?)                                                                           | No                          | Bp_Dicda | 242238628 | B | Bacteria/phages                 | -                                                | No  | 0                    | No  |     |
| 291                                      |            | SWIB/MDM2 domain-containing protein - chromatin condensation, irido-phycodna                                                  | No                          | E9_Poptr | 224056218 | E | uncertain (Eukaryota of NCLDV?) | -                                                | No  | 0                    | No  |     |
| 340                                      |            | Transcription Factor A2-like                                                                                                  | No                          | Vn_Invir | 15078994  | V | NCLDV                           | -                                                | No  | 0                    | No  |     |
| 129                                      |            | ribonuclease H - bacterial                                                                                                    | No                          | Bp_Meslo | 13476236  | B | Bacteria/phages                 | 4.61                                             | No  | 0                    | No  |     |
| 244                                      |            | ribonuclease III (conserved in irido, asco)                                                                                   | No                          | Vn_Ambti | 45686033  | V | NCLDV (Iridogroup)              | 4.62                                             | No  | 0                    | No  |     |
| 222                                      |            | Transcription factor S-II (TFIIS)-domain-containing protein, RNAP subunit                                                     | No                          | Ew_Triva | 123425416 | E | NCLDV                           | 4.63                                             | No  | 0 (checked, deleted) | No  |     |
| 383                                      |            | RNAP subunit Rpb5 - highly divergent from other viruses                                                                       | No                          | E9_Zeama | 226530454 | E | NCLDV                           | 4.64                                             | No  | 1                    | Yes |     |
| 193                                      |            | multiple Zn fingers                                                                                                           | Yes (unique to these three) | Vn_Acapo | 55819526  | V | Amoebozoa (Acan)                | 4.65 (without eukaryota other than Acanthamoeba) | Yes | 249                  | 4   | Yes |
| 321                                      | Cluster 28 | zinc finger protein                                                                                                           | No                          | El_Brafl | 219422757 | E | other Eukaryota                 | -                                                | No  | 0                    | No  |     |
| 70                                       | Cluster 28 | Zn-finger protein                                                                                                             | No                          | El_Anoga | 158285292 | E | other Eukaryota                 | -                                                | No  | 0                    | No  |     |
| 324                                      |            | zinc finger                                                                                                                   | No                          | El_Ratno | 149274619 | E | other Eukaryota                 | -                                                | No  | 0                    | No  |     |
| 81                                       |            | Zn-ribbon-like motif, derived cytidine deaminase?                                                                             | No                          | El_Yarli | 50555826  | E | uncertain                       | 4.66                                             | No  | 0                    | No  |     |
| 344                                      |            | Zn-ribbon-containing protein                                                                                                  | No                          | Bf_Bacce | 196040681 | B | Bacteria/phages                 | -                                                | No  | 0                    | No  |     |
| 391                                      |            | multiple zinc ribbon protein                                                                                                  | No                          | El_Aedae | 157129122 | E | other Eukaryota                 | -                                                | No  | 0                    | No  |     |
| 322                                      |            | zinc finger protein                                                                                                           | No                          | El_Musmu | 110626083 | E | other Eukaryota                 | -                                                | No  | 0                    | No  |     |
| 69                                       |            | zinc finger protein                                                                                                           | No                          | E9_Vitvi | 225447701 | E | other Eukaryota                 | -                                                | No  | 0                    | No  |     |
| 55                                       |            | DNA-directed RNA polymerase subunit alpha; RNA polymerase Rpb1, domains 3-7                                                   | No                          | Ac_Stama | 126465703 | A | NCLDV                           | 4.67                                             | No  | 3                    | Yes |     |
| 52                                       |            | DNA-directed RNA polymerase subunit alpha; RNA polymerase Rpb1, domains 1-2                                                   | No                          | El_Yarli | 50557434  | E | NCLDV                           | 4.68                                             | No  | 3                    | Yes |     |
| 23                                       |            | DNA-directed RNA polymerase subunit beta                                                                                      | No                          | Ec_Plakn | 221059854 | E | other Eukaryota                 | 4.69                                             | No  | 1 (plus 2 short)     | Yes |     |
| 237                                      |            | A1L transcription factor                                                                                                      | No                          | Vn_Invir | 109287904 | V | NCLDV                           | -                                                | No  | 0                    | No  |     |
| <b>Translation (5 proteins, 5 trees)</b> |            |                                                                                                                               |                             |          |           |   |                                 |                                                  |     |                      |     |     |
| 163                                      |            | Translation elongation factor EF-1alpha                                                                                       | No                          | Ea_Dicdi | 66816687  | E | Amoebozoa (Dict)                | 4.70                                             | Yes | 3                    | Yes |     |

|                                                 |           |                                                                                                                                       |                             |          |           |   |                  |      |     |      |                             |     |
|-------------------------------------------------|-----------|---------------------------------------------------------------------------------------------------------------------------------------|-----------------------------|----------|-----------|---|------------------|------|-----|------|-----------------------------|-----|
| 79                                              |           | Translation initiation factor SUI1                                                                                                    | No                          | El_Yarli | 50548179  | E | Amoebozoa (Acan) | 4.71 | Yes | 65,1 | 1                           | Yes |
| 130                                             |           | Eukaryotic peptide chain release (translation termination) factor 1                                                                   | No                          | El_Neur  | 85084324  | E | Amoebozoa (Acan) | 4.72 | Yes |      | 2                           | Yes |
| 400                                             |           | cell division cycle 123 (affects eIF2) homolog                                                                                        | Yes (with four bacteria)    | Vn_Acapo | 55819747  | V | Bacteria/phages  | 4.73 | Yes |      | 0                           | No  |
| 304                                             |           | eukaryotic translation initiation factor 5 (N-terminal Zn-ribbon domain, homolog of eIF2-beta)                                        | No                          | El_Ajeca | 154274059 | E | Amoebozoa (Acan) | 4.74 | No  |      | 3                           | Yes |
| <b>Miscellaneous<br/>(23 proteins, 8 trees)</b> |           |                                                                                                                                       |                             |          |           |   |                  |      |     |      |                             |     |
| 99                                              |           | Flavin-containing amine oxidoreductase                                                                                                | Yes (one group on the tree) | Vn_Acapo | 55819068  | V | Amoebozoa (Acan) | 4.75 | No  |      | 1                           | Yes |
| 161                                             |           | mannosyltransferase OCH1-like protein                                                                                                 | No                          | Bb_Leeb1 | 86142254  | B | uncertain        | -    | No  |      |                             | No  |
| 162                                             |           | mannosyltransferase OCH1-like protein                                                                                                 | No                          | Bp_Fraph | 241668223 | B | other Eukaryota  | 4.76 | Yes |      | 0                           | No  |
| 328                                             |           | glycosyl transferase                                                                                                                  | No                          | Bb_Pardi | 150009744 | B | Bacteria/phages  | 4.76 | Yes |      | 0                           | No  |
| 363                                             |           | calcineurin-like phosphoesterase                                                                                                      | No                          | Bp_Rhisp | 227822772 | B | uncertain        | 4.77 | Yes |      | 3                           | Yes |
| 210                                             |           | Rossmann-fold nucleotide-binding protein widely conserved in bacteria and phages, truncated gene in mimi, functionally linked to NDR? | No                          | Bb_Capgi | 228472699 | B | Bacteria/phages  | 4.78 | Yes |      | short                       | No  |
| 103                                             | Cluster 1 | MORN-repeat protein (bacterial)                                                                                                       | No                          | Bu_Fusnu | 197737419 | B | Bacteria/phages  | -    | No  |      | Y (repeats)                 | Yes |
| 159                                             | Cluster 1 | MORN-repeat protein (bacterial)                                                                                                       | No                          | Bi_Fibsu | 241899983 | B | Bacteria/phages  | -    | No  |      | Y (repeats)                 | Yes |
| 124                                             | Cluster 1 | MORN-like domain                                                                                                                      | No                          | Ba_Nocfa | 54022764  | B | Bacteria/phages  | -    | No  |      | Y (repeats)                 | Yes |
| 361                                             | Cluster 1 | MORN-repeat protein (bacterial)                                                                                                       | No                          | Bu_Fusnu | 197735567 | B | Bacteria/phages  | -    | No  |      | Y (repeats)                 | Yes |
| 355                                             | Cluster 1 | MORN-repeat protein (bacterial)                                                                                                       | No                          | Bu_Fussp | 237743875 | B | Bacteria/phages  | -    | No  |      | Y (repeats)                 | Yes |
| 366                                             | Cluster 1 | MORN-repeat protein (bacterial)                                                                                                       | No                          | Bu_Fussp | 237740028 | B | Bacteria/phages  | -    | No  | 41,2 | Y (repeats)                 | Yes |
| 434                                             | Cluster 1 | MORN repeat-containing protein (a protein conserved in bacteria)                                                                      | No                          | Bb_Capgi | 228471690 | B | Bacteria/phages  | -    | No  |      | Y (repeats)                 | Yes |
| 134                                             | Cluster 1 | MORN-repeat protein                                                                                                                   | No                          | Bp_Helci | 224438121 | B | Bacteria/phages  | -    | No  |      | Y (repeats)                 | Yes |
| 137                                             | Cluster 1 | MORN repeat protein                                                                                                                   | No                          | Bp_Burth | 167836308 | B | Bacteria/phages  | -    | No  |      | 0                           | No  |
| 142                                             | Cluster 1 | MORN repeat protein                                                                                                                   | No                          | Ba_Strsv | 197785586 | B | Bacteria/phages  | -    | No  |      | 0                           | No  |
| 143                                             | Cluster 1 | MORN repeat protein                                                                                                                   | No                          | Ec_Thean | 85000317  | E | Bacteria/phages  | -    | No  |      | Y                           | Yes |
| 144                                             | Cluster 1 | MORN repeat protein                                                                                                                   | No                          | El_Aspni | 145253667 | E | Bacteria/phages  | -    | No  |      | Y                           | Yes |
| 279                                             |           | bacterial MORN repeats                                                                                                                | No                          | B1_Elumi | 187250911 | B | Bacteria/phages  | -    | No  |      | 0                           | No  |
| 74                                              |           | Metal dependent phosphohydrolase with conserved 'HD' motif                                                                            | No                          | Bb_Chrg1 | 227368134 | B | other Eukaryota  | 4.79 | Yes |      | 1 (short; checked, removed) | Yes |
| 426                                             |           | WD repeat protein                                                                                                                     | No                          | Ea_Dicdi | 66811920  | E | Amoebozoa (Acan) | 4.80 | Yes |      | 3                           | Yes |
| 451                                             |           | glycosyltransferase                                                                                                                   | No                          | El_Monbr | 167520782 | E | uncertain        | 4.81 | No  |      | 0                           | No  |

|     |            |                                                                                                      |                             |           |           |   |                  |      |     |     |                    |     |
|-----|------------|------------------------------------------------------------------------------------------------------|-----------------------------|-----------|-----------|---|------------------|------|-----|-----|--------------------|-----|
| 342 |            | major capsid protein (ortholog of poxvirus D13)                                                      | No                          | Vn_Invir  | 15078986  | V | NCLDV            | 4.82 | No  | 2   | Yes                |     |
|     |            | <b>unknown (conserved protein)</b><br><b>(38 proteins, 7 trees)</b>                                  |                             |           |           |   |                  |      |     |     |                    |     |
| 339 |            | unknown, conserved in irido, phycodna, and mimi                                                      | No                          | Vn_Invir  | 15078999  | V | NCLDV            | -    | No  | 0   | No                 |     |
| 126 |            | uncharacterized protein conserved in several bacteria and eukaryotes, and mimivirus (low similarity) | Yes (one group on the tree) | Bp_Rossp  | 225130762 | B | Amoebozoa (Acan) | 4.83 | No  | 109 | 1                  | Yes |
| 183 | Cluster 7  | contains an uncharacterized conserved domain found in diverse bacterial and phage proteins           | No                          | Bp_Escoco | 218703839 | B | Bacteria/phages  | 4.84 | No  |     | 0                  | No  |
| 180 | Cluster 7  | T5orf172 domain (pfam1544)-containing protein                                                        | No                          | Ew_Triva  | 123367738 | E | uncertain        | -    | No  |     | 0                  | No  |
| 34  | Cluster 7  | contains an uncharacterized conserved domain found in diverse bacterial and phage proteins           | No                          | Bp_Xanau  | 154247566 | B | Bacteria/phages  | 4.84 | No  |     | 0                  | No  |
| 263 |            | conserved in only 2 iridoviruses                                                                     | No                          | Vn_Invir  | 15079041  | V | uncertain        | -    | No  |     | 0                  | No  |
| 104 |            | Uncharacterized protein conserved in bacteria and mimivirus                                          | No                          | Ea_Dicdi  | 166240195 | E | uncertain        | 4.85 | Yes |     | 0                  | No  |
| 111 |            | uncharacterized protein with homologs in some bacteria                                               | No                          | Bp_Metpe  | 124262756 | B | Amoebozoa (Acan) | 4.86 | No  | 229 | 1                  | Yes |
| 230 |            | uncharacterized, conserved domain in MIMI_L371                                                       | Yes (one group on the tree) | Vn_Acapo  | 55819246  | V | Amoebozoa (Acan) | 4.87 | No  |     | 1                  | Yes |
| 255 |            | uncharacterized TIM-barrel protein conserved in numerous bacteria                                    | No                          | Bp_Geosp  | 222054426 | B | Bacteria/phages  | 4.88 | No  |     | 0                  | No  |
| 420 |            | uncharacterized protein conserved in bacteria and archaea                                            | No                          | Ba_Micsp  | 238061377 | B | Amoebozoa (Acan) | 4.89 | No  |     | 1                  | Yes |
| 296 |            | membrane protein                                                                                     | No                          | Vn_Invir  | 15078925  | V | NCLDV            | -    | No  |     | 0                  | No  |
| 253 |            | low compl prot, proline-rich repeats                                                                 | No                          | Bf_Cloth  | 125975557 | B | uncertain        | -    | No  |     | Y (low complexity) | Yes |
| 368 |            | low complexity                                                                                       | No                          | El_Droan  | 194753654 | E | uncertain        | -    | No  |     | Y (low complexity) | Yes |
| 114 |            | HA-like repeats                                                                                      | No                          | Bp_Limsp  | 149925860 | B | Bacteria/phages  | -    | No  |     | Y (repeats)        | Yes |
| 26  | Cluster 5  | distinct repeats; similar to hypothetical protein PBCV1_A540L                                        | No                          | Bi_CanKo  | 94967383  | B | Bacteria/phages  | -    | No  |     | Y (repeats)        | Yes |
| 67  | Cluster 5  | low complexity, HA-like repeats                                                                      | No                          | Bi_CanKo  | 94967383  | B | Bacteria/phages  | -    | No  |     | Y (repeats)        | Yes |
| 45  | Cluster 5  | low complexity, HA-like repeats                                                                      | No                          | Bi_CanKo  | 94967383  | B | Bacteria/phages  | -    | No  |     | Y (repeats)        | Yes |
| 66  | Cluster 5  | low complexity, HA-like repeats                                                                      | No                          | Bi_CanKo  | 94967383  | B | Bacteria/phages  | -    | No  |     | Y (repeats)        | Yes |
| 44  | Cluster 5  | distinct repeats                                                                                     | No                          | Bb_Leeb1  | 86140522  | B | Bacteria/phages  | -    | No  |     | Y (repeats)        | Yes |
| 25  | Cluster 5  | low complexity, HA-like repeats                                                                      | No                          | Bf_Weipa  | 241894892 | B | Bacteria/phages  | -    | No  |     | Y (repeats)        | Yes |
| 149 | Cluster 16 | low complexity                                                                                       | No                          | El_Brafl  | 219481367 | E | uncertain        | -    | No  |     | Y (repeats)        | Yes |
| 73  | Cluster 16 | low complexity, invasin-like repeats                                                                 | No                          | Bp_Escoco | 110643846 | B | uncertain        | -    | No  |     | Y (repeats)        | Yes |
| 24  |            | T5orf172 domain (pfam1544)-containing protein                                                        | No                          | Ba_Rhoer  | 33867084  | B | Bacteria/phages  | -    | No  |     | 1                  | Yes |
| 403 |            | RING-domain (cd00162) -containing protein                                                            | No                          | Vn_Acapo  | 55819461  | V | uncertain        | -    | No  |     | 2 (short)          | Yes |
| 229 |            | uncharacterized ,C-terminal domain conserved in irido, asco, phycodna, mimi                          | No                          | Vn_Invir  | 15078780  | V | NCLDV            | -    | No  |     | 0                  | No  |

|     |                                                                                          |                       |          |           |   |                 |   |     |      |     |
|-----|------------------------------------------------------------------------------------------|-----------------------|----------|-----------|---|-----------------|---|-----|------|-----|
| 333 | unknown, orthologs in all phycodna                                                       | No                    | Vn_Ostvi | 163955082 | V | NCLDV           | - | No  | 0    | No  |
| 259 | uncharacterized, unique to Chilo virus                                                   | No                    | Vn_Invir | 15078840  | V | NCLDV           | - | No  | 0    | No  |
| 16  | similar to hypothetical protein PBCV1_A579L                                              | No                    | Vn_Parbu | 9632130   | V | NCLDV           | - | No  | 0    | No  |
| 338 | membrane protein, also homolog in mimi                                                   | No                    | Vn_Acatu | 155371047 | V | NCLDV           | - | No  | 0    | No  |
| 369 | distant homolog only in Chilo iridovirus                                                 | No                    | Vn_Invir | 15079069  | V | uncertain       | - | No  | 0    | No  |
| 219 | low complexity, leucine rich repeat protein                                              | No                    | El_Ratno | 62638851  | E | uncertain       | - | No  | 0    | No  |
| 18  | conserved in Mimi-, Mama-, marseillevirus and Chordopoxvirinae. pfam00651;BTB/POZ domain | No                    | E9_Zeama | 219362591 | E | other Eukaryota | - | No  | 0    | No  |
| 433 | hypothetical protein conserved inMimi- and Marseillevirus                                | No                    | Vn_Acapo | 55819715  | V | NCLDV           | - | Yes | 0    | No  |
| 430 | hypothetical protein conserved inMimi- and Marseillevirus                                | Yes (no tree however) | Vn_Acapo | 55819043  | V | NCLDV           | - | Yes | 3    | Yes |
| 233 | uncharacterized, poorly conserved inirido, phycodna                                      | No                    | Vn_Invir | 15079047  | V | NCLDV           | - | No  | 0    | No  |
| 200 | hypotetical protein found in Irido- and marseillevirus                                   | No                    | Vn_Invir | 15079178  | V | NCLDV           | - | No  | weak | No  |
| 21  | uncharacterized bacterial protein                                                        | No                    | Bd_Deira | 15806713  | B | Bacteria/phages | - | No  | 0    | No  |

\* B, *Bacteria*; E, *Eukaryota*; V, *Virus*

\*\*Acan, *Acanthamoeba*; Dict, *Dictyostelium*; Enta, *Entamoeba*; Phycodna, *Phycodnaviruses*; Poxvir, *Poxviridae*
